# Supplementary material for: Mutations of the Calcium Channel Gene cacophony Suppress Seizures in Drosophila
Source: PubMed Central journal article supplement (PMC4714812; doi:10.1371/journal.pgen.1005784), 2016-01-15
Supplement: pgen.1005784.s002.pdf [file pgen.1005784.s002.pdf]

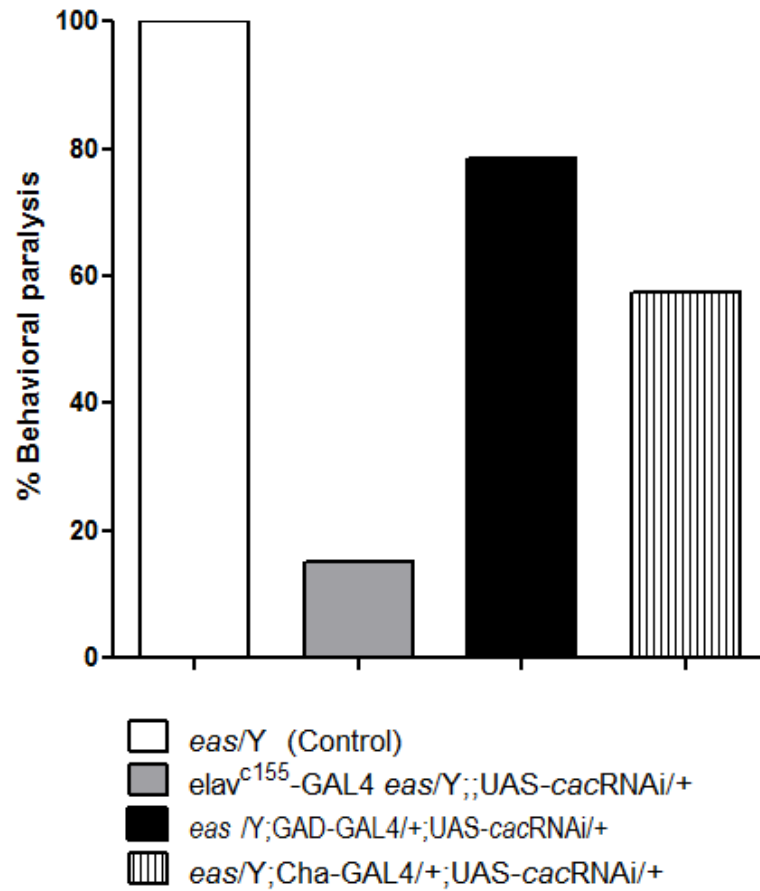

Figure S2.
